# Supplementary material for: Increased Use and Large Variation in Strong Opioids and Metamizole (Dipyrone) for Minor and Major Musculoskeletal Injuries Between 2008 and 2018: An Analysis of a Representative Sample of Swiss Workers
Source: Springer Nature journal article supplement (doi:10.1007/s10926-023-10115-5), 2023-04-11
Supplement: MOESM1 [file 25225162]

**Weak opioids**

| ATC code | Adm.R | DDD  | U   | Morpheq | DDD mg | Long / Short | Substance                |
|----------|-------|------|-----|---------|--------|--------------|--------------------------|
| N02AA08  | O     | 0.15 | g   | 0.1     | 150    | Long         | Dihydrocodeine           |
| N02AA59  | O     | 120  | Mg* | 0.15    | 120    | Short        | Codeine, combinations    |
| N02AA59  | R     | 80   | Mg* | 0.15    | 80     | Short        | Codeine, combinations    |
| N02AX01  | O     | 0.2  | G   | 0.2     | 200    | Short        | Tilidine                 |
| N02AX02  | O     | 0.3  | G   | 0.2     | 300    | Short        | Tramadol                 |
| N02AX02  | O     | 0.3  | G   | 0.2     | 300    | Long         | Tramadol                 |
| N02AX02  | P     | 0.3  | G   | 0.2     | 300    | Short        | Tramadol                 |
| N02AX02  | R     | 0.3  | G   | 0.2     | 300    | Short        | Tramadol                 |
| N02AX06  | O     | 0.4  | G   | 0.4     | 400    | Short        | Tapentadol               |
| N02AX06  | O     | 0.4  | G   | 0.4     | 400    | Long         | Tapentadol               |
| N02AX52  | O     | 150  | mg  | 0.2     | 150    | Short        | Tramadol combinations    |
| N02AJ13  | O     | 0.3  | G   | 0.2     | 300    | Short        | Tramadol and paracetamol |
| N02AJ06  | O     | 0.12 | G   | 0.15    | 120    | Short        | Codeine and paracetamol  |
| N02AJ06  | R     | 0.12 | G   | 0.15    | 120    | Short        | Codeine and paracetamol  |

**Strong opioids**

| ATC code | Adm.R | DDD | U  | Morpheq | DDD mg | Long / Short | Substance     |
|----------|-------|-----|----|---------|--------|--------------|---------------|
| N02AA01  | O     | 0.1 | g  | 1       | 100    | Short        | Morphine      |
| N02AA01  | O     | 0.1 | g  | 1       | 100    | Long         | Morphine      |
| N02AA01  | P     | 30  | mg | 1       | 30     | Short        | Morphine      |
| N02AA01  | R     | 30  | mg | 1       | 30     | Short        | Morphine      |
| N02AA03  | O     | 20  | mg | 5       | 20     | Short        | Hydromorphone |
| N02AA03  | O     | 20  | mg | 5       | 20     | Long         | Hydromorphone |
| N02AA03  | P     | 4   | mg | 17.5    | 4      | Short        | Hydromorphone |
| N02AA04  | O     | 30  | mg | 1       | 30     | Short        | Nicomorphine  |
| N02AA04  | P     | 30  | mg | 3       | 30     | Short        | Nicomorphine  |
| N02AA04  | R     | 30  | mg | 1       | 30     | Short        | Nicomorphine  |
| N02AA05  | O     | 75  | mg | 1.5     | 75     | Short        | Oxycodone     |
| N02AA05  | O     | 75  | mg | 1.5     | 75     | Long         | Oxycodone     |

|         |    |        |       |     |       |                         |
|---------|----|--------|-------|-----|-------|-------------------------|
| N02AA05 | P  | 30 mg  | 3     | 30  | Short | Oxycodone               |
| N02AA55 | O  | 75 mg  | 1.5   | 75  | Long  | Oxycodone, combinations |
| N02AB02 | P  | 0.4 G  | 0.4   | 400 | Short | Pethidine               |
| N02AB03 | N  | 0.6 mg | 100   | 0.6 | Short | Fentanyl                |
| N02AB03 | SL | 0.6 mg | 100   | 0.6 | Short | Fentanyl                |
| N02AB03 | TD | 1.2 mg | 112.5 | 1.2 | Long  | Fentanyl                |
| N02AE01 | P  | 1.2 mg | 100   | 1.2 | Long  | Buprenorphine           |
| N02AE01 | SL | 1.2 mg | 75    | 1.2 | Long  | Buprenorphine           |
| N02AE01 | TD | 1.2 mg | 91.67 | 1.2 | Long  | Buprenorphine           |
| N02AF02 | P  | 80 mg  | 3     | 80  | Short | Nalbuphine              |
| N07BC01 | SL | 8 mg   | 75    | 8   | Long  | Buprenorphine           |
| N07BC02 | O  | 25 mg  | 4.7   | 25  | Long  | Methadone               |
| N07BC02 | P  | 25 mg  | 13.5  | 25  | Short | Methadone               |
| N07BC02 | R  | 30 mg  | 4.7   | 30  | Short | Methadone               |

Adm.R, administration route; O, oral; P, parenteral; R, rectal; SL, sublingual; TD, transdermal; N, nasal; DDD, defined daily dose is the assumed average maintenance dose per day for a drug used for its main indication in adults [69]; U, unit; morpheq, Morphine Equivalent Conversion Factor (strength of opioid drug in mg per unit x quantity of units per reimbursed package x number of packages x conversion factor for morphine equivalents. Transmucosal fentanyl conversion MED in milligram for transdermal fentanyl patches were calculated: (mcg/hour (according to the package reimbursed) x 72 hours' x number of patches per package x number of packages reimbursed x 100 [fentanyl conversion factor]) / 1000. MED in milligram for transdermal buprenorphine patches were calculated: (mcg/h according to the package reimbursed x 96 hours' x number of patches per package x number of packages reimbursed x 95 [buprenorphine conversion factor]) / 1000.

\*All DDD are based on the WHO ATC provided daily dose except for codeine. In Switzerland, codeine is available in combination with paracetamol for pain treatment. No DDD from the WHO were available for codeine-combinations. Therefore, the average treatment dose of the combinations was used to calculate DDD: e.g. Co-Dafalgan® four times daily = 4x20mg codeine.
